# Supplementary material
Source: PubMed Central journal article supplement (PMC6497546)
Supplement: NIHMS1525261-supplement-3.pdf [file NIHMS1525261-supplement-3.pdf]

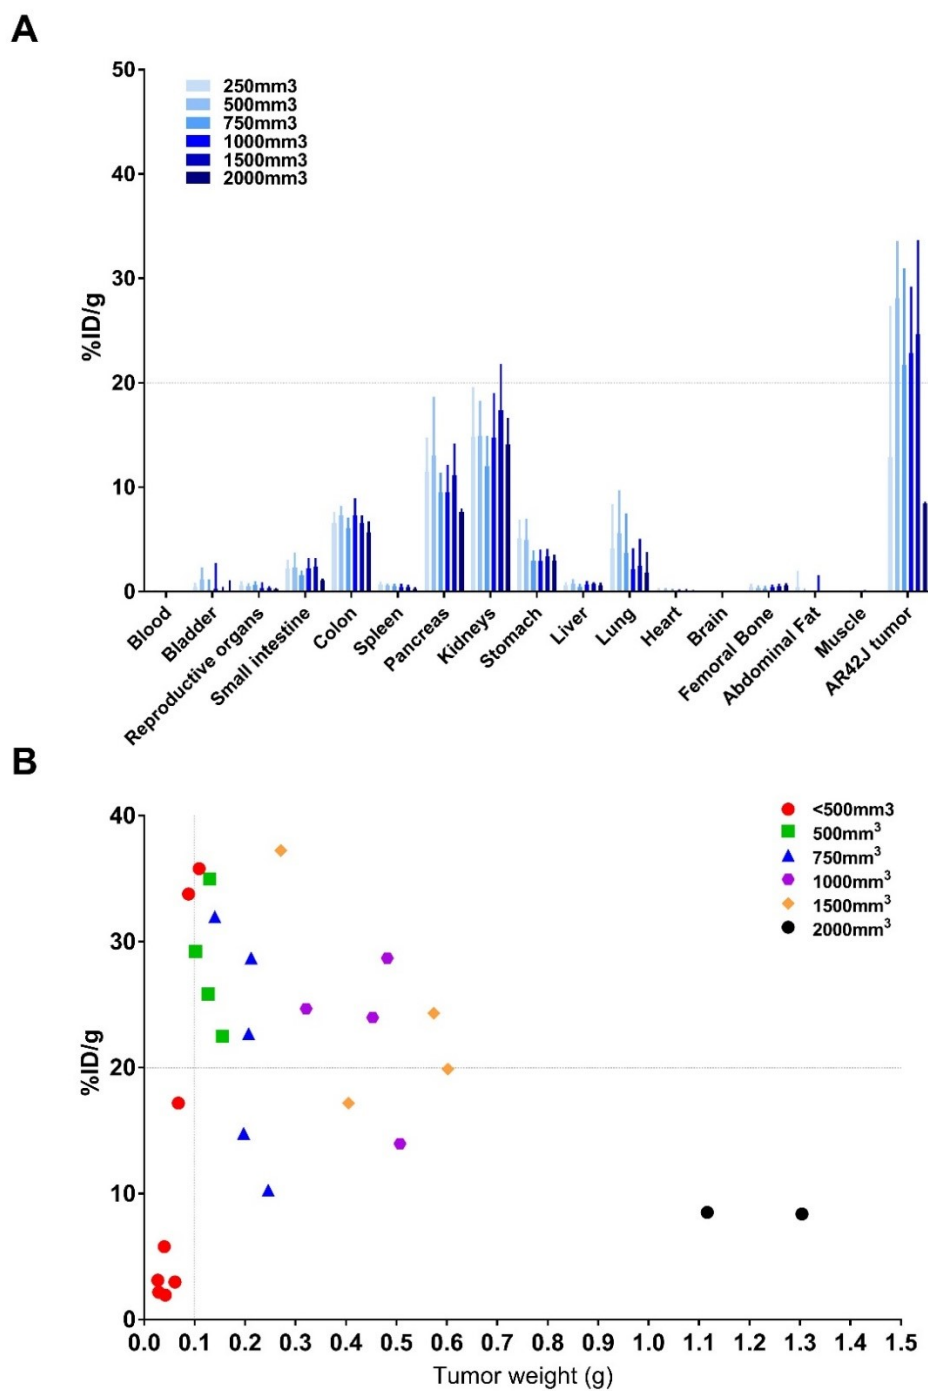

**Figure S3. Biodistribution of  $^{212}\text{Pb}$ -DOTAMTATE in Varying Size Tumors.** Figure S3 shows a biodistribution of the drug in tumors up to  $2000\text{mm}^3$ . A. %ID/g at 4hr post drug injection in tumors at  $250\text{mm}^3$  (n=8),  $500\text{mm}^3$  (n=4),  $750\text{mm}^3$  (n=5),  $1000\text{mm}^3$  (n=4), and  $1500\text{mm}^3$  (n=4). B. Individual tumors from each tumor group:  $<500\text{mm}^3$  (red),  $500\text{mm}^3$  (green),  $750\text{mm}^3$  (blue),  $1000\text{mm}^3$  (purple),  $1500\text{mm}^3$  (orange) show no correlation between size and %ID/g.
