# Supplementary material
Source: PubMed Central journal article supplement (PMC6497546)
Supplement: NIHMS1525261-supplement-4.pdf [file NIHMS1525261-supplement-4.pdf]

A

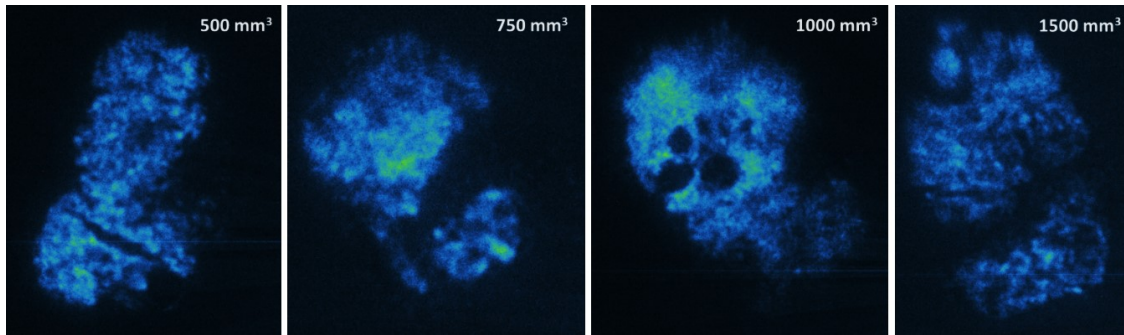

B

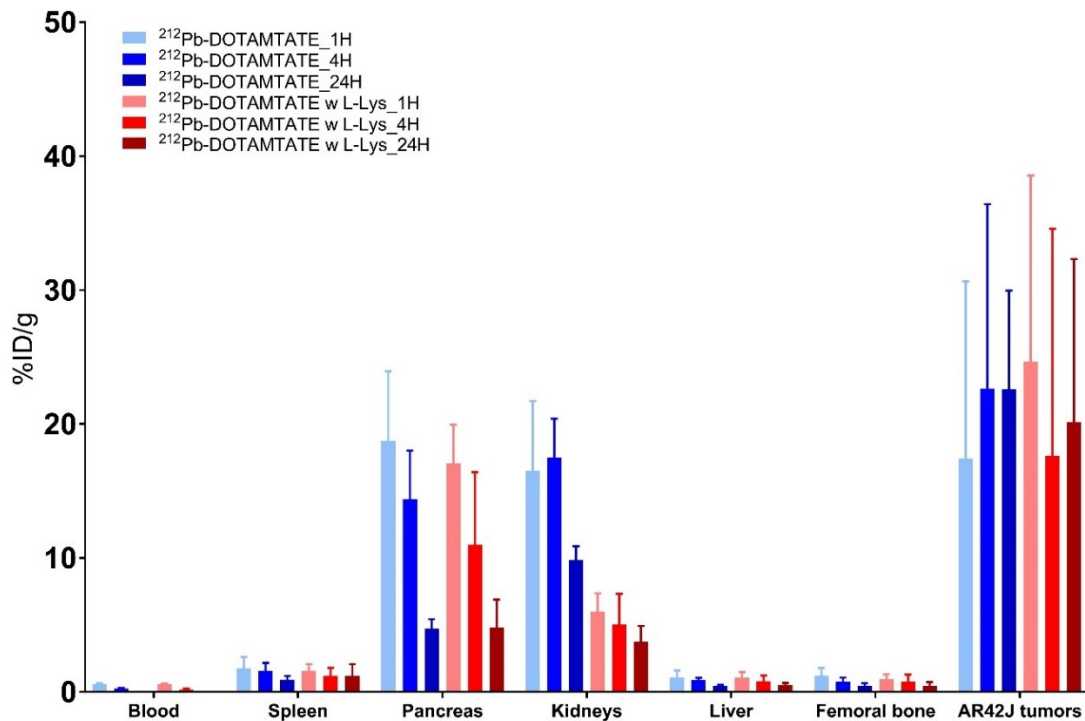

**Figure S4. Drug Microdistribution Through Tumor and Effect of Kidney Protection Agent.** Figure S4 shows Alpha-imaging of  $^{212}\text{Pb-DOTAMTATE}$  and biodistribution of  $^{212}\text{Pb-DOTAMTATE}$  in AR42J-tumor bearing mice with kidney protection agent, L-lysine. A. Microdistribution of  $^{212}\text{Pb-DOTAMTATE}$  in cryosectioned AR42J xenograft tissue samples imaged using a high-sensitivity QHYCCD camera. Panel A show tumor sections of increasing tumor sizes ( $500\text{mm}^3$  to  $1500\text{mm}^3$ ) B.  $200\mu\text{L}$  of L-Lys ( $35\text{mg}$ ) in saline (red gradient) was given IV five minutes before drug injection. No kidney protection agent control shown in blue gradient. Five athymic nude mice per group. %ID/g shown at 1 hour, 4 hours and 24 hours post injection in various organs.
